# Supplementary material for: Zn/Cd status-dependent accumulation of Zn and Cd in root parts in tobacco is accompanied by specific expression of ZIP genes
Source: Springer Nature journal article supplement (doi:10.1186/s12870-020-2255-3), 2020-01-22
Supplement: MOESM1 [file 12870_2020_2255_MOESM1_ESM.pdf]

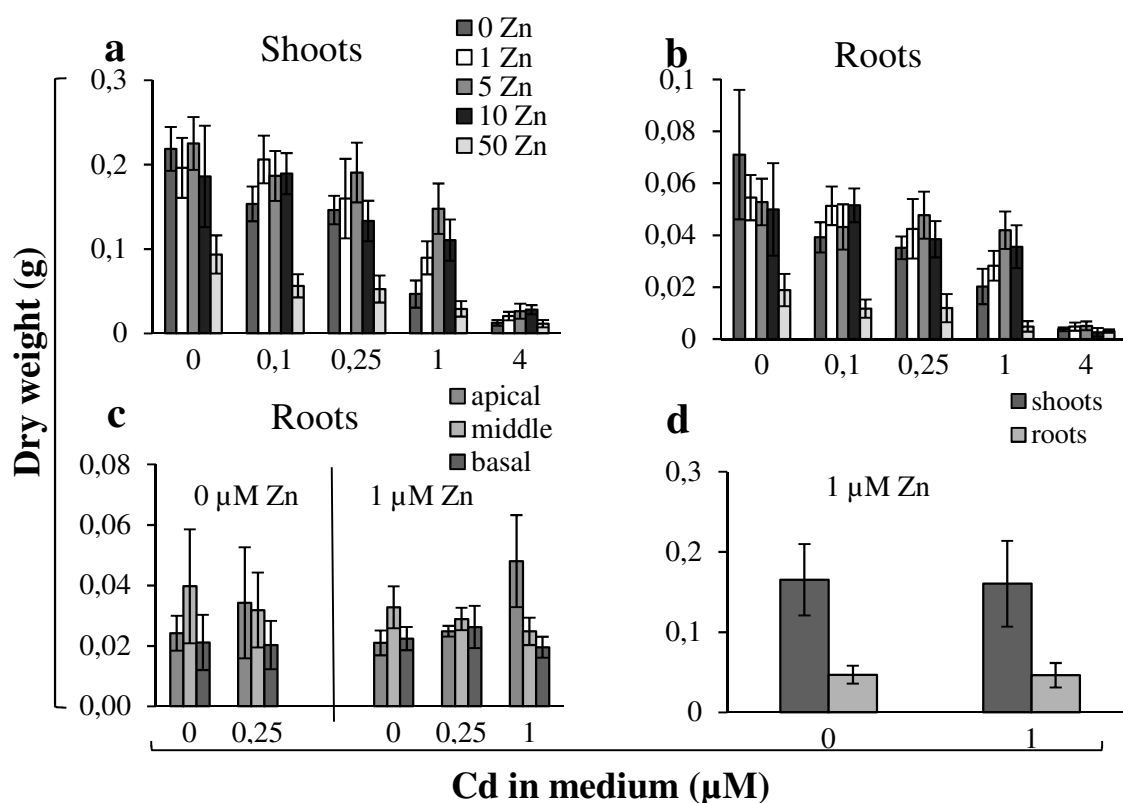

#### Additional file 1:

Dry weight of shoots (a) and roots (b) of 6-week-old plants grown for 3.5 weeks at control conditions and subsequently exposed to pairwise combinations of Zn (0; 1; 5; 10; 50  $\mu\text{M}$ ) and Cd (0; 0.1; 0.25; 1; 4  $\mu\text{M}$ ) concentration for 17 days, for which Zn and Cd concentrations were determined and shown in Figs. 1,2

Dry weight of the apical, middle and basal root parts (c) of 6-week-old plants grown for 3.5 weeks at control conditions and subsequently exposed to combinations of Zn (0; 1  $\mu\text{M}$ ) and Cd (0; 0.25  $\mu\text{M}$ ; 1  $\mu\text{M}$ ) concentration for 17 days, for which Zn and Cd concentrations were determined and shown in Fig. 3.

Dry weight of the shoots and roots (d) of 5 week-old plants grown at control conditions and subsequently exposed to combinations of Zn (1  $\mu\text{M}$ ) and Cd (0; 1  $\mu\text{M}$ ) concentrations for 3 days, for which Zn and Cd concentrations were determined and shown in Fig. 7.
